# Supplementary material for: Comparative analyses of 32 complete plastomes of Tef (Eragrostis tef ) accessions from Ethiopia: phylogenetic relationships and mutational hotspots
Source: PeerJ journal article supplement (doi:10.7717/peerj.9314), 2020-06-19

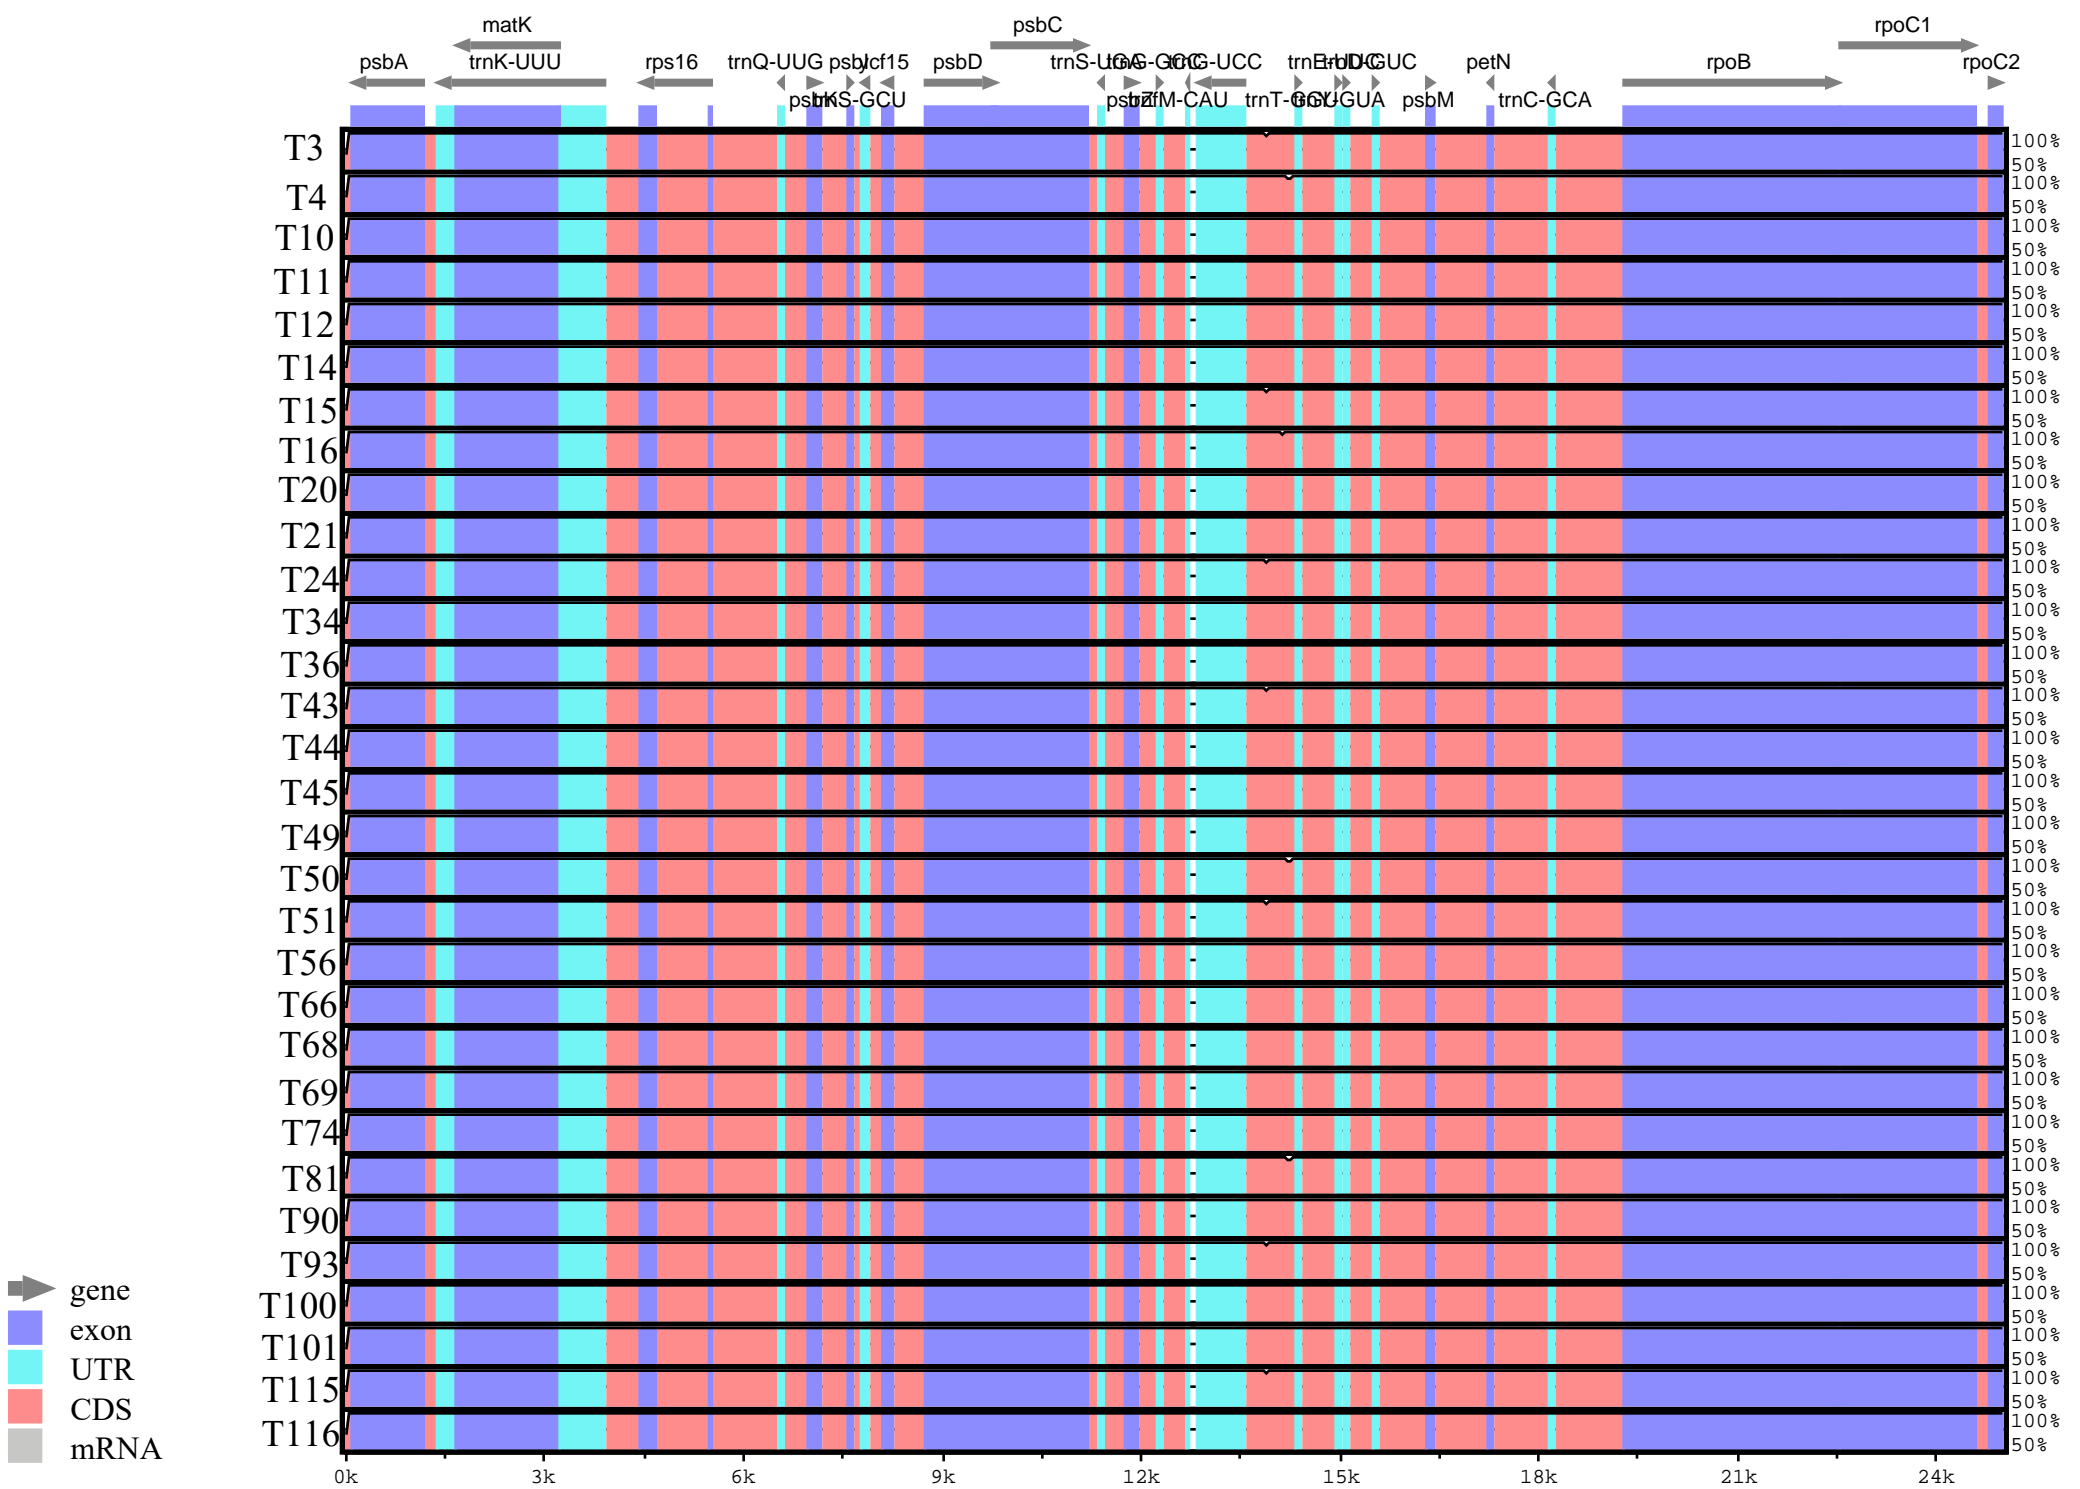

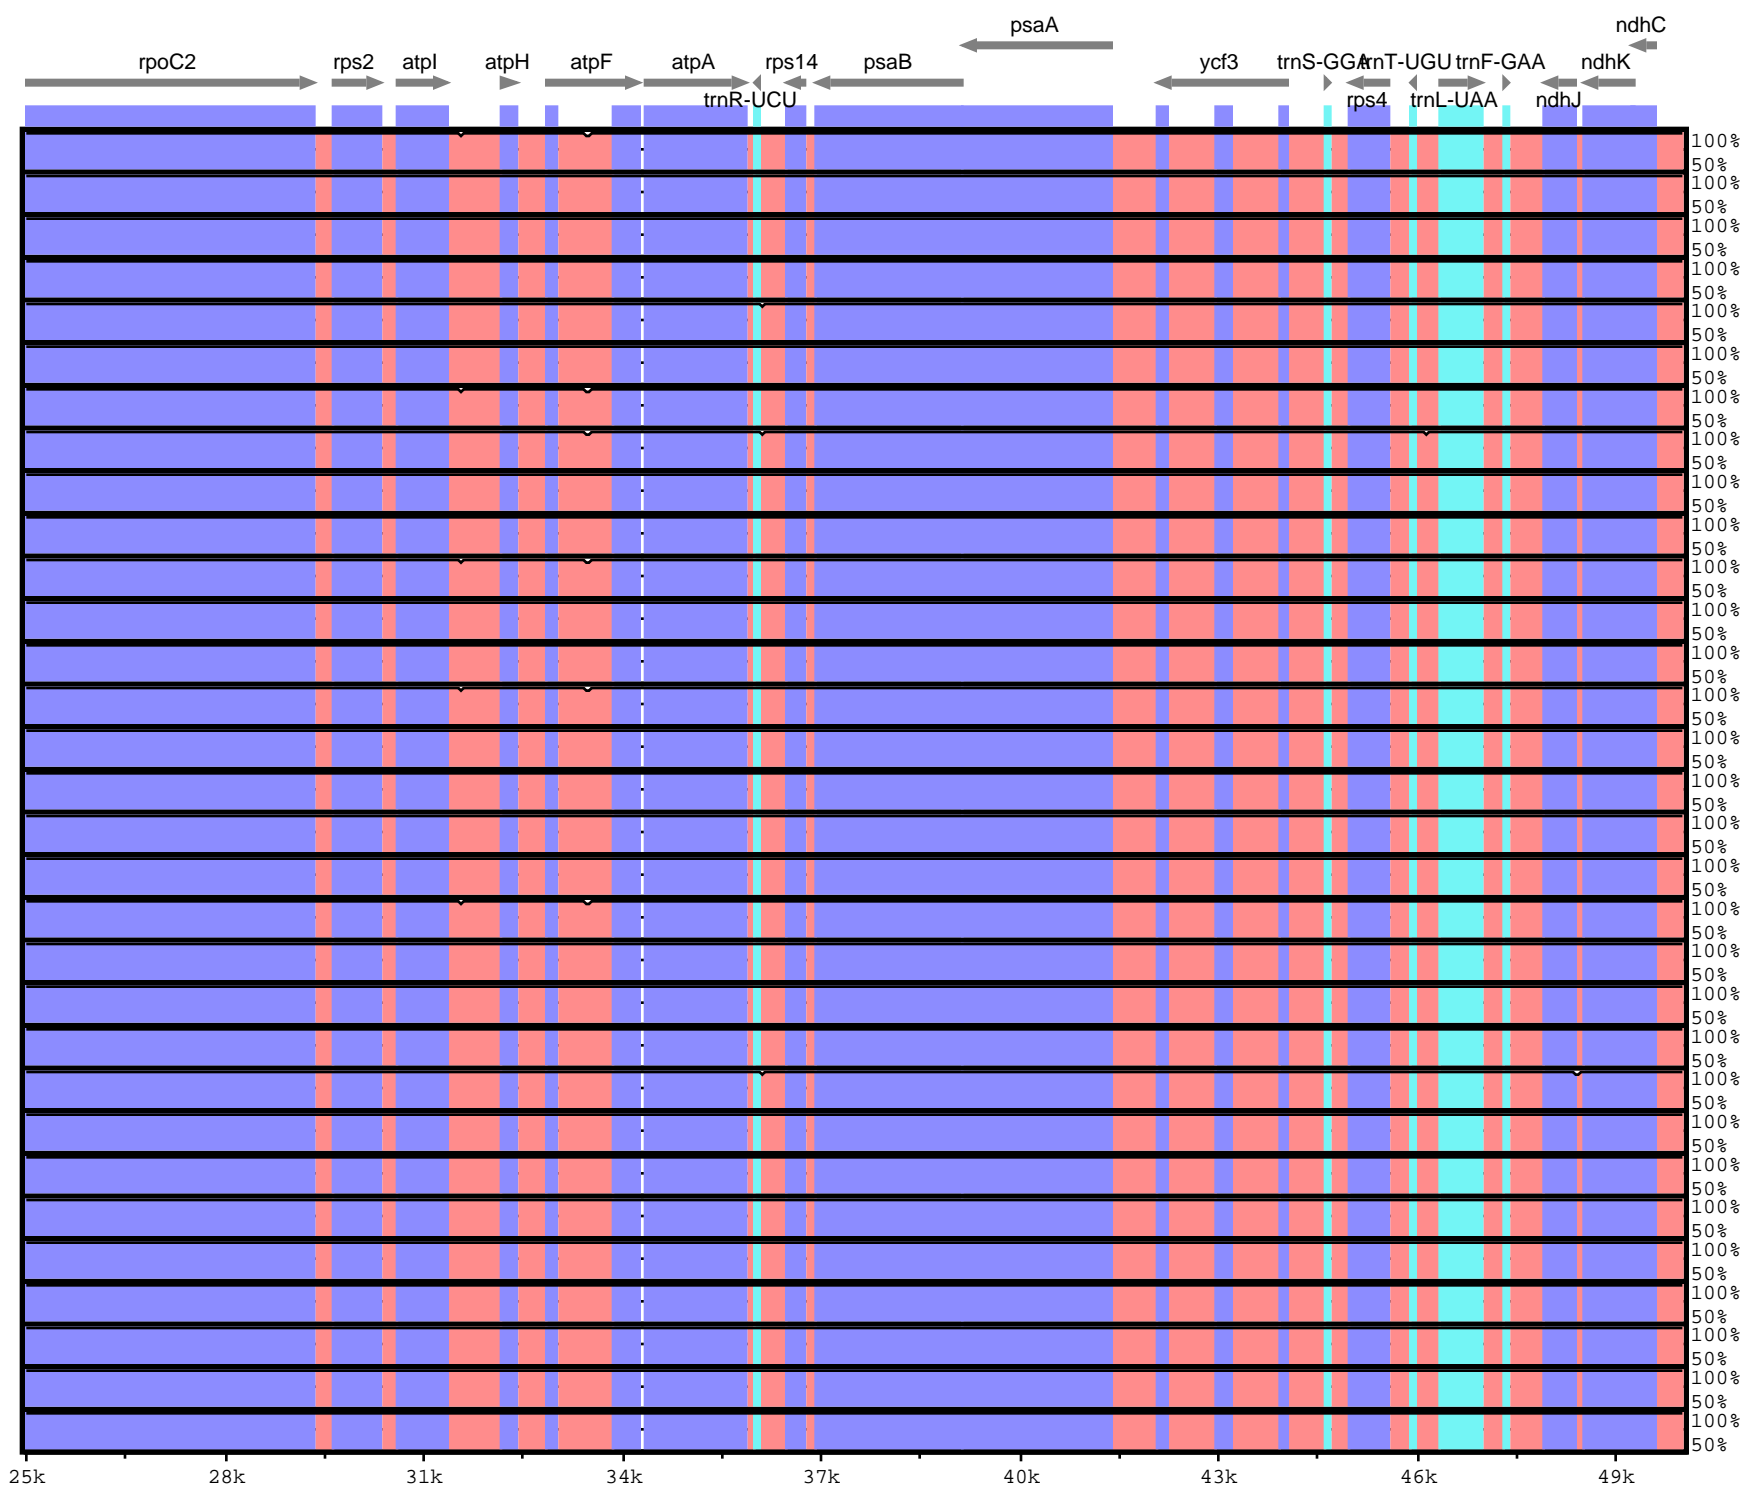

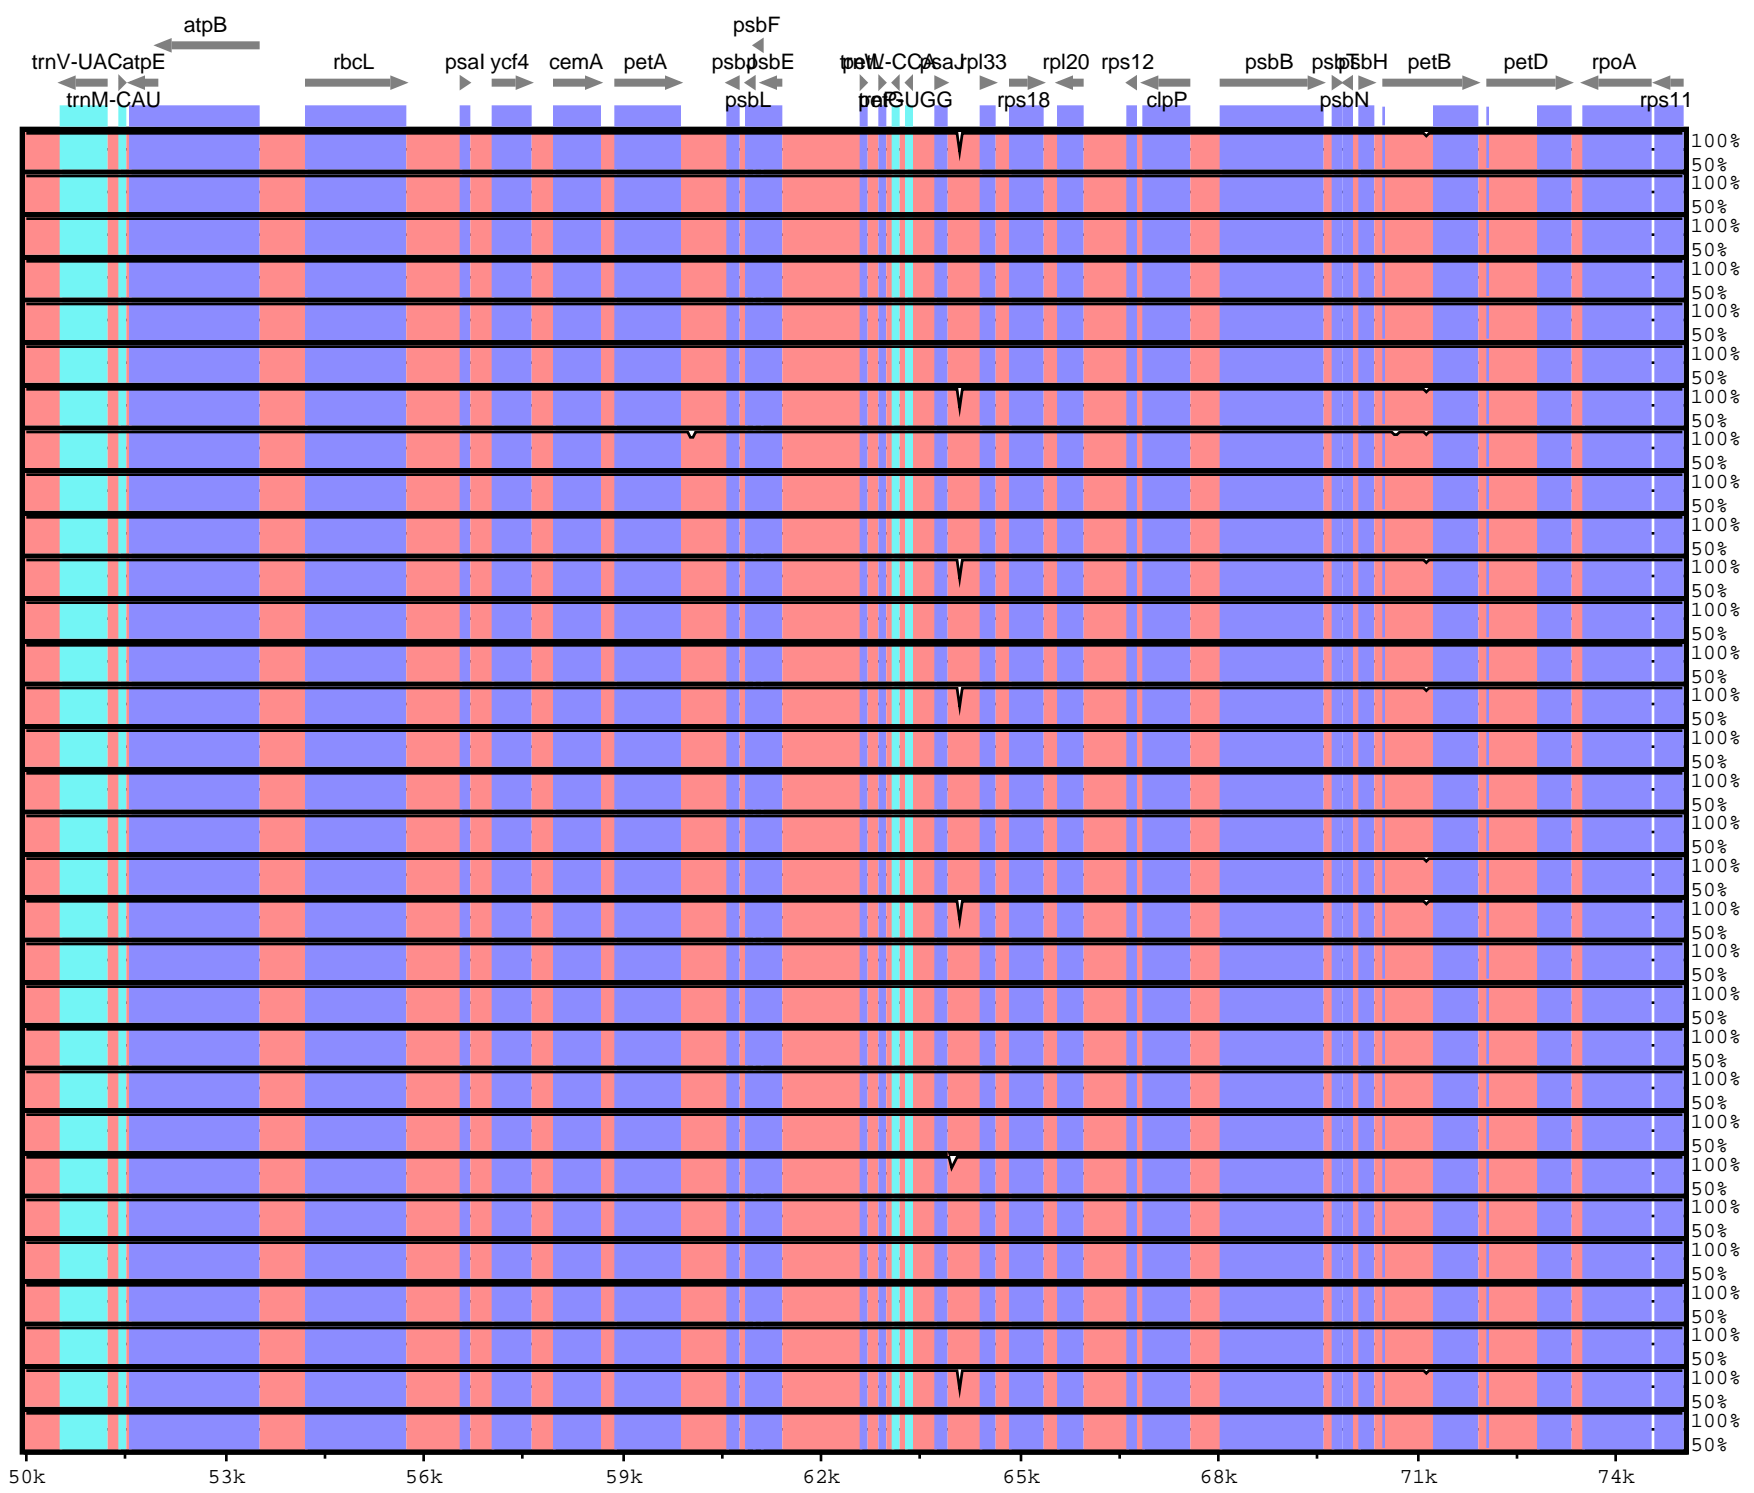

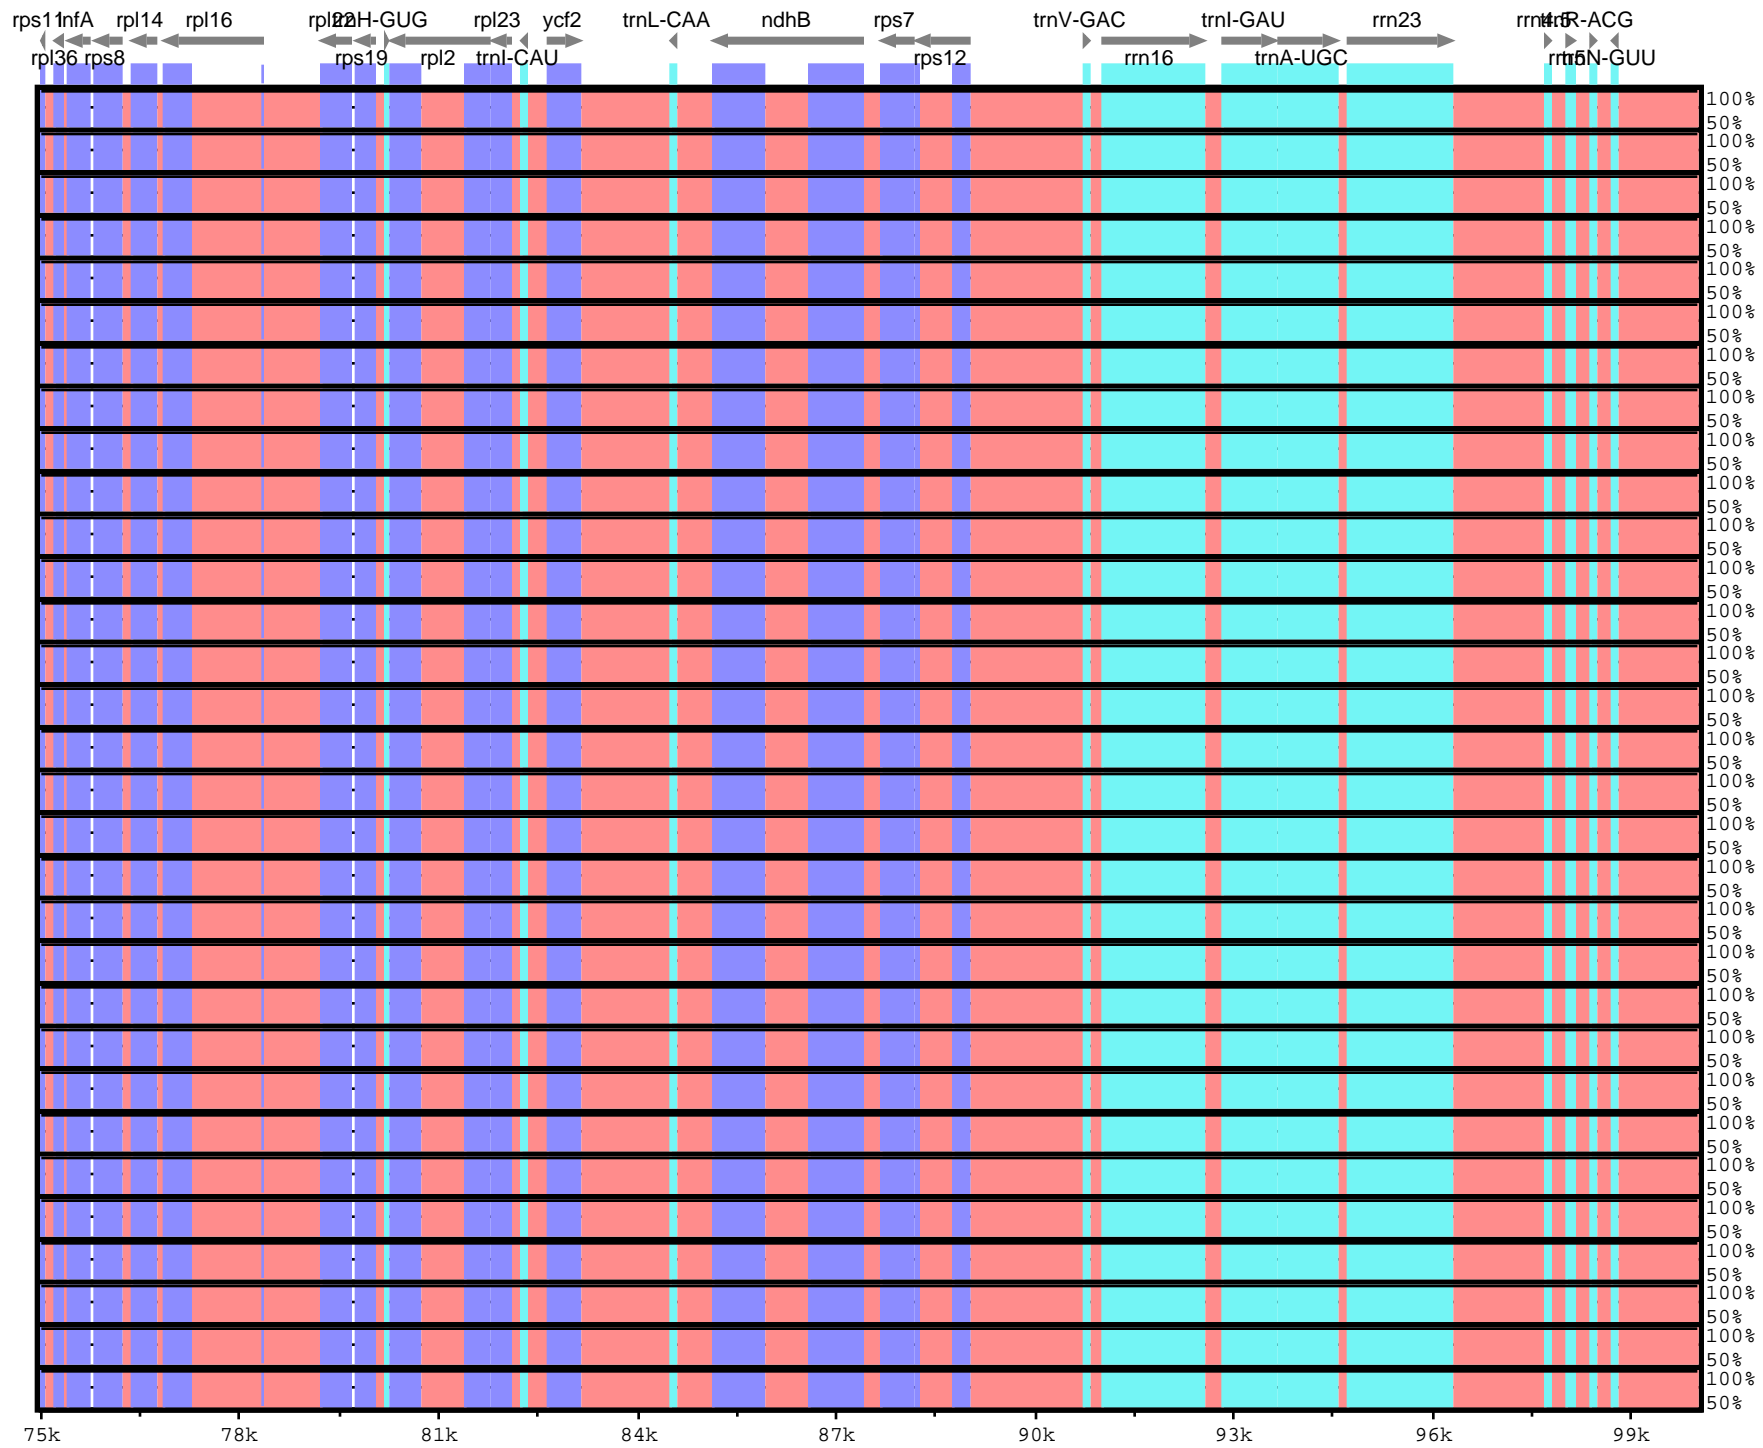

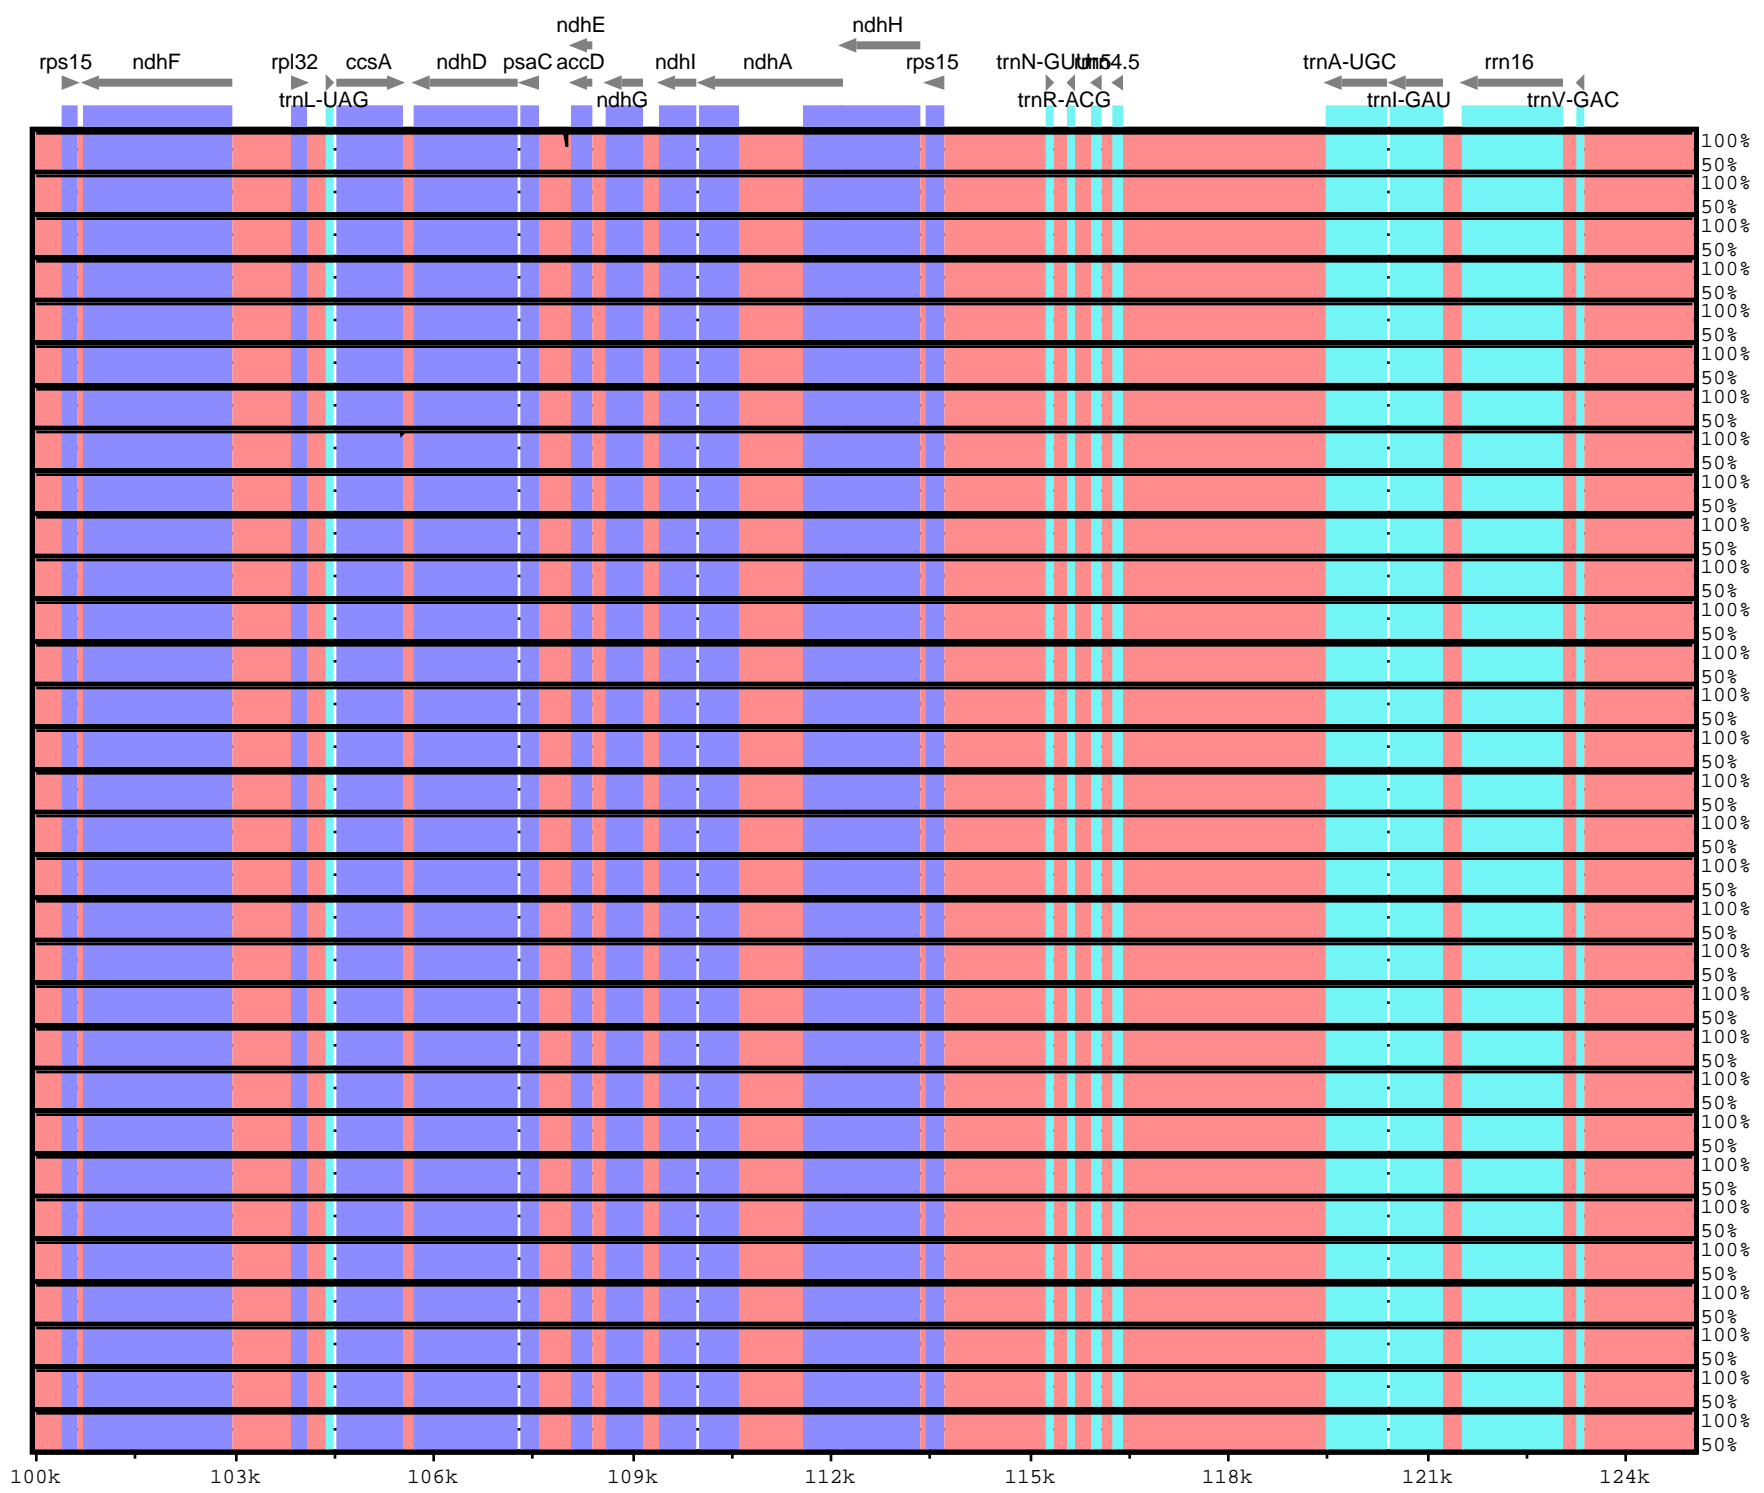

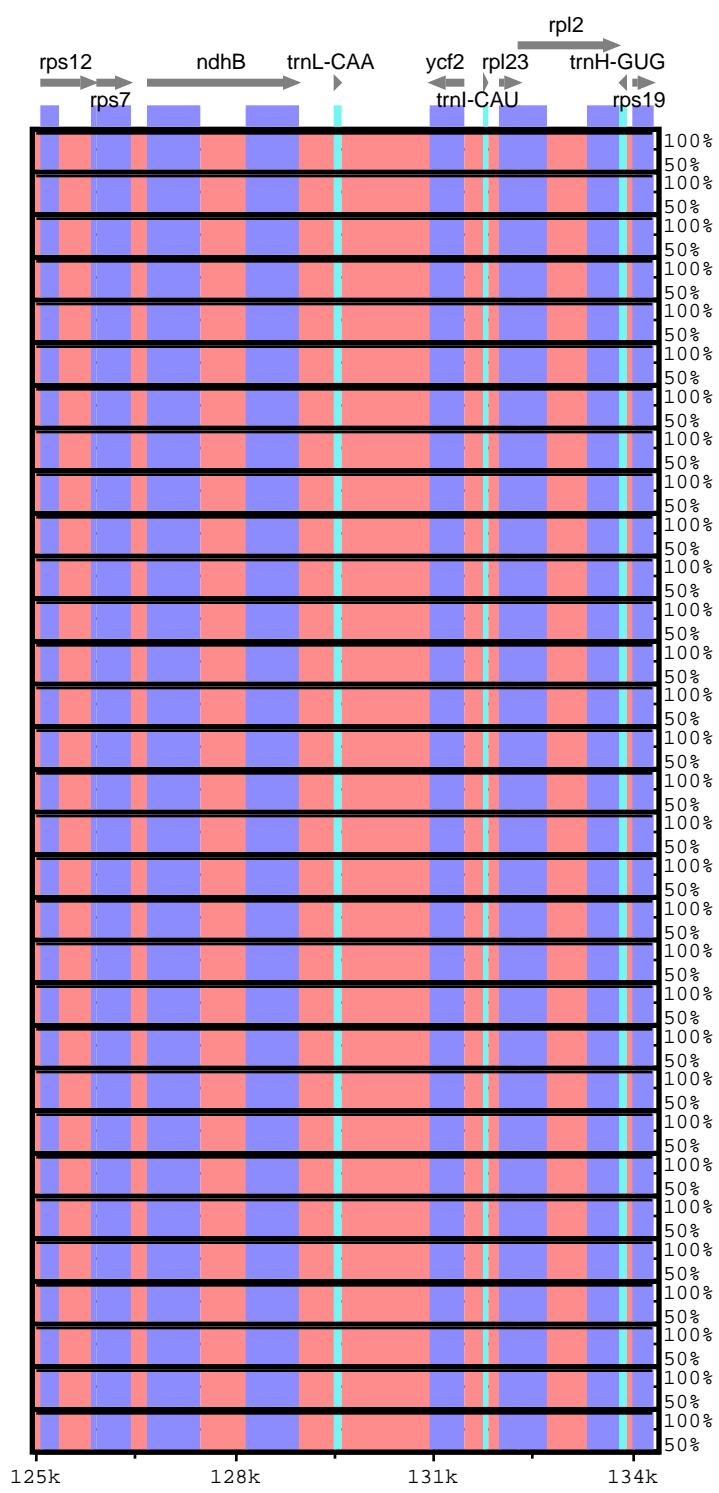

Supplement: Fig_S2.pdf [file Fig_S2.pdf]
